# Supplementary material for: Advantages of naphthalene as a building block for organic solid state laser dyes: smaller energy gaps and enhanced stability
Source: Royal Society of Chemistry journal article supplement (doi:10.1039/d0tc05387b), 2021-01-01
Supplement: d0tc05387b1.pdf [file d0tc05387b1.pdf]

## Supporting information

Naphthalene as building block for organic laser dyes with smaller energy gaps and enhanced stability

Yuya Oyama,<sup>a,b</sup> Masashi Mamada,<sup>a,b,c,\*</sup> Akihiro Kondo,<sup>d\*</sup> Chihaya Adachi<sup>a,b,c,e,\*</sup>

<sup>a</sup> Center for Organic Photonics and Electronics Research (OPERA), Kyushu University, Fukuoka 819-0395, Japan

<sup>b</sup> JST, ERATO, Adachi Molecular Exciton Engineering Project c/o Center for Organic Photonics and Electronics Research (OPERA), Kyushu University, Nishi, Fukuoka 819-0395, Japan

<sup>c</sup> Academia-Industry Molecular Systems for Devices Research and Education Center (AIMS), Kyushu University, Nishi, Fukuoka 819-0395, Japan

<sup>d</sup> R & D Center, NIPPON SHIZAI CO., LTD. 923-2, Touendo, Aisho-cho, Echi-gun, Shiga, 529-1325, Japan

<sup>e</sup> International Institute for Carbon Neutral Energy Research (WPI-I2CNER), Kyushu University, Nishi, Fukuoka 819-0395, Japan

\*Corresponding author.

E-mail address: mamada@opera.kyushu-u.ac.jp (M. Mamada)

E-mail address: a-kondo@nippon-shizai.com (A. Kondo)

E-mail address: adachi@cstf.kyushu-u.ac.jp (C. Adachi)

## Contents:

|                                                                                                                                        |    |
|----------------------------------------------------------------------------------------------------------------------------------------|----|
| <b>Fig. S1.</b> TG-DTA for <b>1–3</b> and BSBCz. ....                                                                                  | 3  |
| <b>Fig. S2.</b> <sup>1</sup> H NMR spectra before and after heating. ....                                                              | 4  |
| <b>Fig. S3.</b> Photoelectron yield spectroscopy measurements.....                                                                     | 5  |
| <b>Fig. S4.</b> Cyclic voltammograms (CV) and differential pulse voltamograms (DPV).....                                               | 5  |
| <b>Table S1.</b> Redox potentials, HOMO-LUMO levels and energy gaps.....                                                               | 5  |
| <b>Fig. S5.</b> Molecular orbitals of <b>1</b> , <b>2</b> and <b>3</b> . ....                                                          | 6  |
| <b>Table S2.</b> Calculated energies and first vertical excitation energies (VEE) of <b>1</b> , <b>2</b> and <b>3</b> . ....           | 7  |
| <b>Fig. S6.</b> Out-of-plane X-ray diffractograms ..... 7                                                                              | 7  |
| <b>Fig. S7.</b> AFM images for doped and neat films..... 8                                                                             | 8  |
| <b>Fig. S8.</b> Variable-angle spectroscopic ellipsometry measurements ..... 9                                                         | 9  |
| <b>Table S3.</b> Ordinary and extraordinary refractive indices and horizontally orientation order parameters.. 9                       | 9  |
| <b>Fig. S9.</b> DSC curves of 1, 2 and 3. .... 10                                                                                      | 10 |
| <b>Fig. S10.</b> Photo-stability for BSBCz..... 11                                                                                     | 11 |
| <b>Fig. S11.</b> ASE properties of <b>3</b> ..... 11                                                                                   | 11 |
| <b>Methods. S1.</b> Calculation of the absorption and stimulated emission cross sections ..... 12                                      | 12 |
| <b>Fig. S12.</b> Absorption and stimulated emission cross sections ( $\sigma_{\text{abs}}$ and $\sigma_{\text{em}}$ ) spectra ..... 12 | 12 |
| <b>Data S1.</b> NMR spectra of <b>1–3</b> ..... 13                                                                                     | 13 |
| <b>Supplementary Reference</b> ..... 17                                                                                                | 17 |

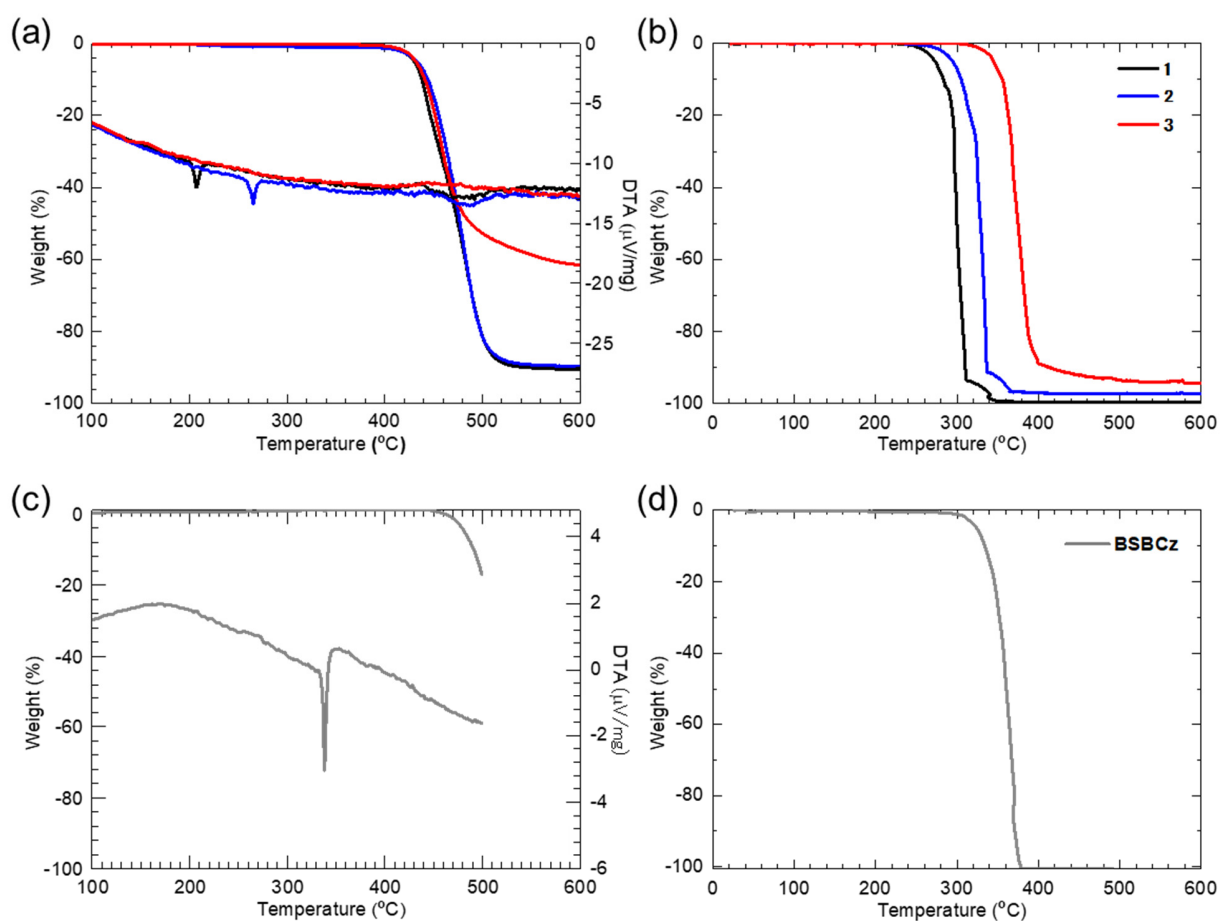

**Fig. S1.** TG-DTA for 1–3 and BSBCz. (a) TG-DTA at  $10^5$  Pa and (b) TG at 1 Pa for 1, 2 and 3. (c) TG-DTA at  $10^5$  Pa and (d) TG at 1 Pa for BSBCz. (5 wt% loss temperature represents the decomposition at ambient pressure and sublimation in vacuum.)

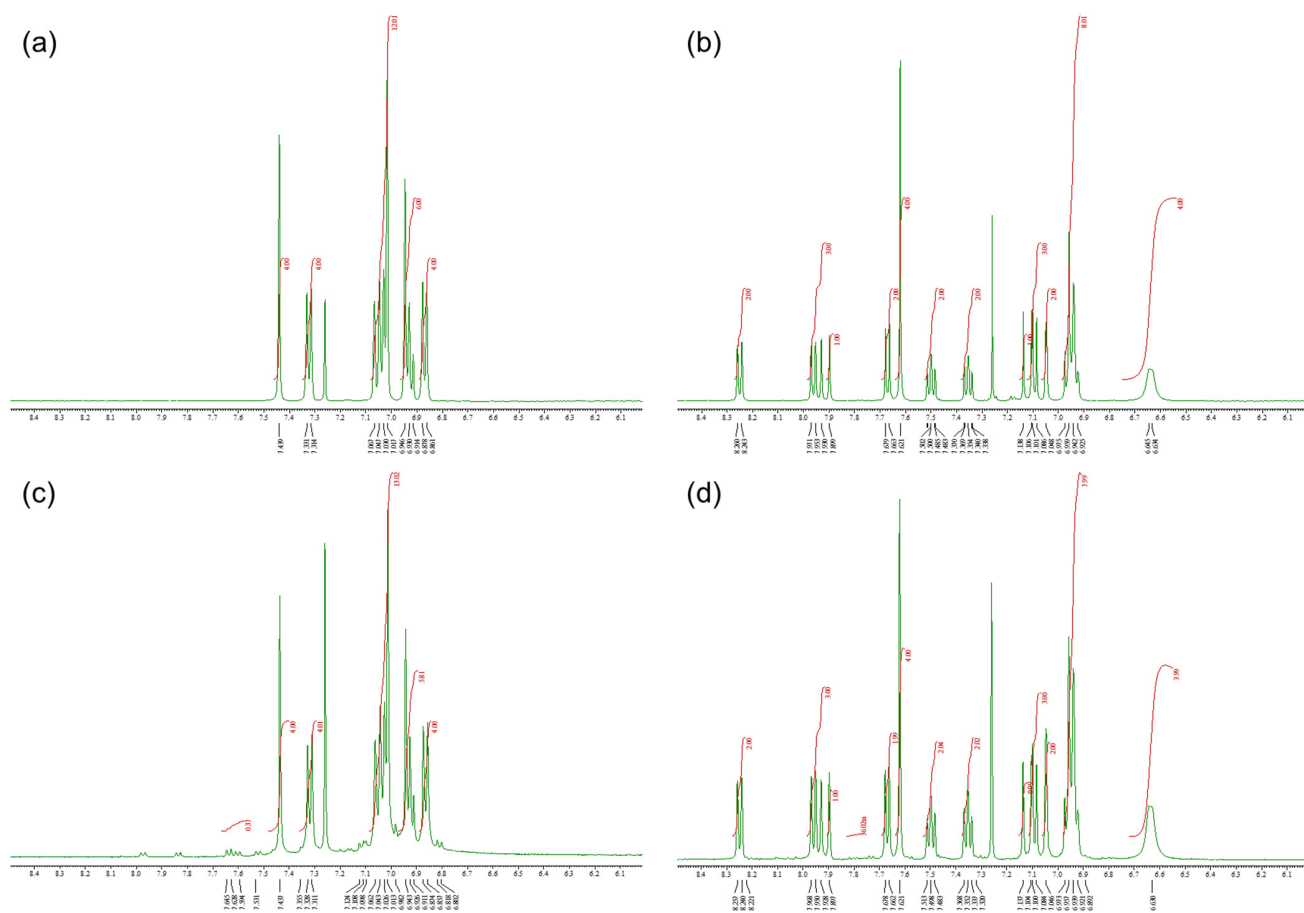

**Fig. S2.**  $^1\text{H}$  NMR spectra before and after heating.  $^1\text{H}$  NMR spectra of (a) **1** before, (b) **2** before, (c) **1** after, and (d) **2** after heating at 300 °C.

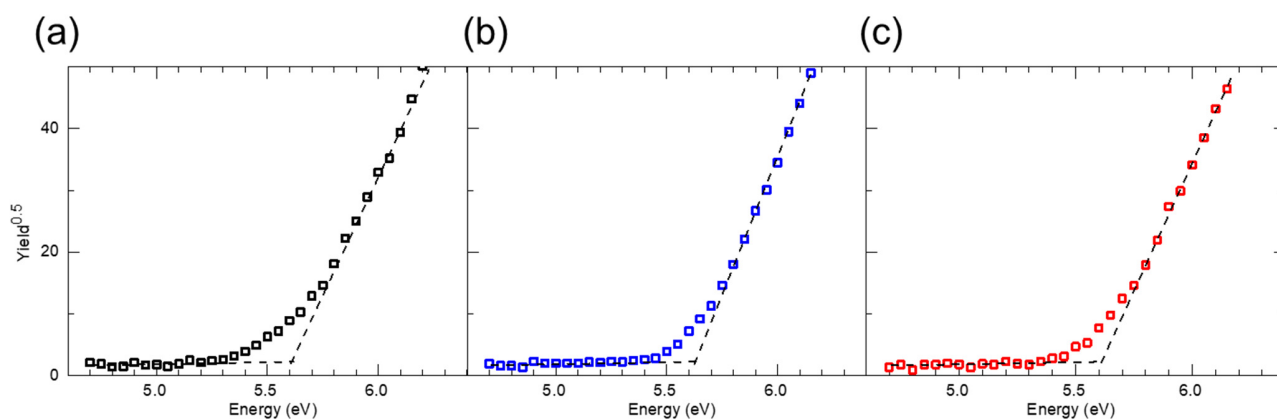

**Fig. S3.** Photoelectron yield spectroscopy measurements for neat films of (a) **1**, (b) **2** and (c) **3** recorded with a Riken Keiki AC-3.

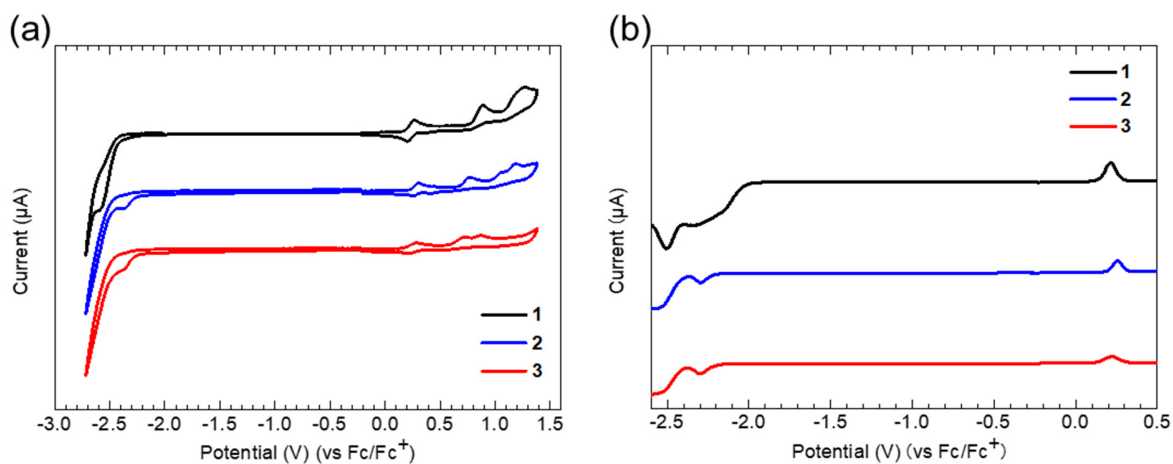

**Fig. S4.** Cyclic voltammograms (CV) and differential pulse voltammograms (DPV). (a) CV and (b) DPV of **1**, **2** and **3** in dichloromethane (vs Fc/Fc<sup>+</sup>).

**Table S1.** Redox potentials, HOMO-LUMO levels and energy gaps of **1**, **2** and **3**.

| Compd.   | CV                  |                      | DPV                 |                      | HOMO (eV) | LUMO (eV) | $E_g^{\text{redox}}$ (V) | $E_g^{\text{opt}}$ (V) |
|----------|---------------------|----------------------|---------------------|----------------------|-----------|-----------|--------------------------|------------------------|
|          | $E_{\text{ox}}$ (V) | $E_{\text{red}}$ (V) | $E_{\text{ox}}$ (V) | $E_{\text{red}}$ (V) |           |           |                          |                        |
| <b>1</b> | 0.240               | -2.55                | 0.217               | -2.49                | -5.02     | -2.32     | 2.70                     | 2.70                   |
| <b>2</b> | 0.285               | -2.37                | 0.256               | -2.30                | -5.06     | -2.50     | 2.56                     | 2.48                   |
| <b>3</b> | 0.255               | -2.37                | 0.222               | -2.30                | -5.01     | -2.50     | 2.51                     | 2.39                   |

|                                                                                              |                                                                                     |                                                                                       |
|----------------------------------------------------------------------------------------------|-------------------------------------------------------------------------------------|---------------------------------------------------------------------------------------|
| 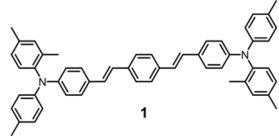 <p>1</p>   | top view                                                                            | front view                                                                            |
| LUMO                                                                                         |    |    |
| HOMO                                                                                         |    |    |
|  <p>2</p>   | top view                                                                            | front view                                                                            |
| LUMO                                                                                         |   |   |
| HOMO                                                                                         |  |  |
|  <p>3</p> | top view                                                                            | front view                                                                            |
| LUMO                                                                                         |  |  |
| HOMO                                                                                         |  |  |

Fig. S5. Molecular orbitals of 1, 2 and 3.

**Table S2.** Calculated energies and first vertical excitation energies (VEE) of **1**, **2** and **3**.

| Compd.   | HOMO [eV] | LUMO [eV] | Gap [eV] | S <sub>1</sub> -vertical [eV] | VEE                             |
|----------|-----------|-----------|----------|-------------------------------|---------------------------------|
| <b>1</b> | -4.76     | -1.89     | 2.87     | -57688.636                    | 2.5546 eV, 485 nm, $f = 2.4058$ |
| <b>2</b> | -4.89     | -2.10     | 2.79     | -66050.371                    | 2.4243 eV, 511 nm, $f = 1.6406$ |
| <b>3</b> | -4.90     | -2.26     | 2.64     | -82651.737                    | 2.2708 eV, 546 nm, $f = 1.2741$ |

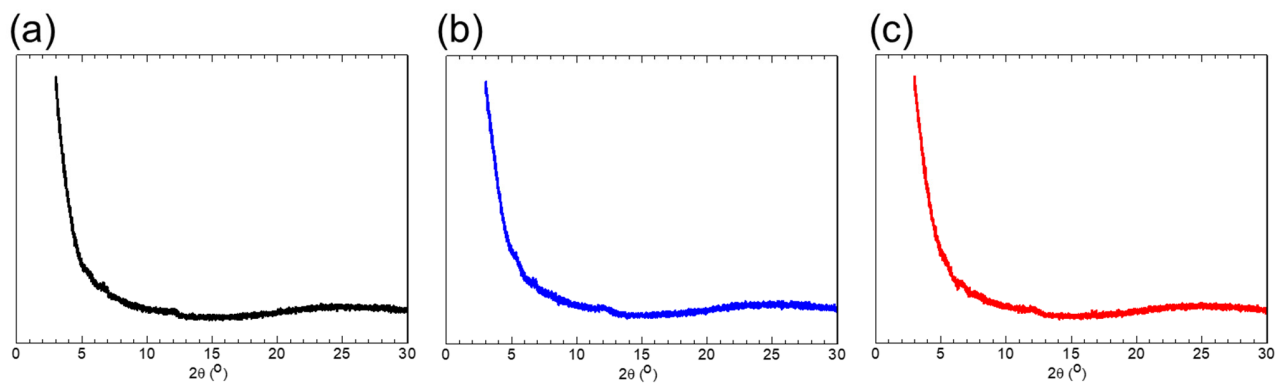**Fig. S6.** Out-of-plane X-ray diffractograms of (a) **1**, (b) **2** and (c) **3** in neat films.

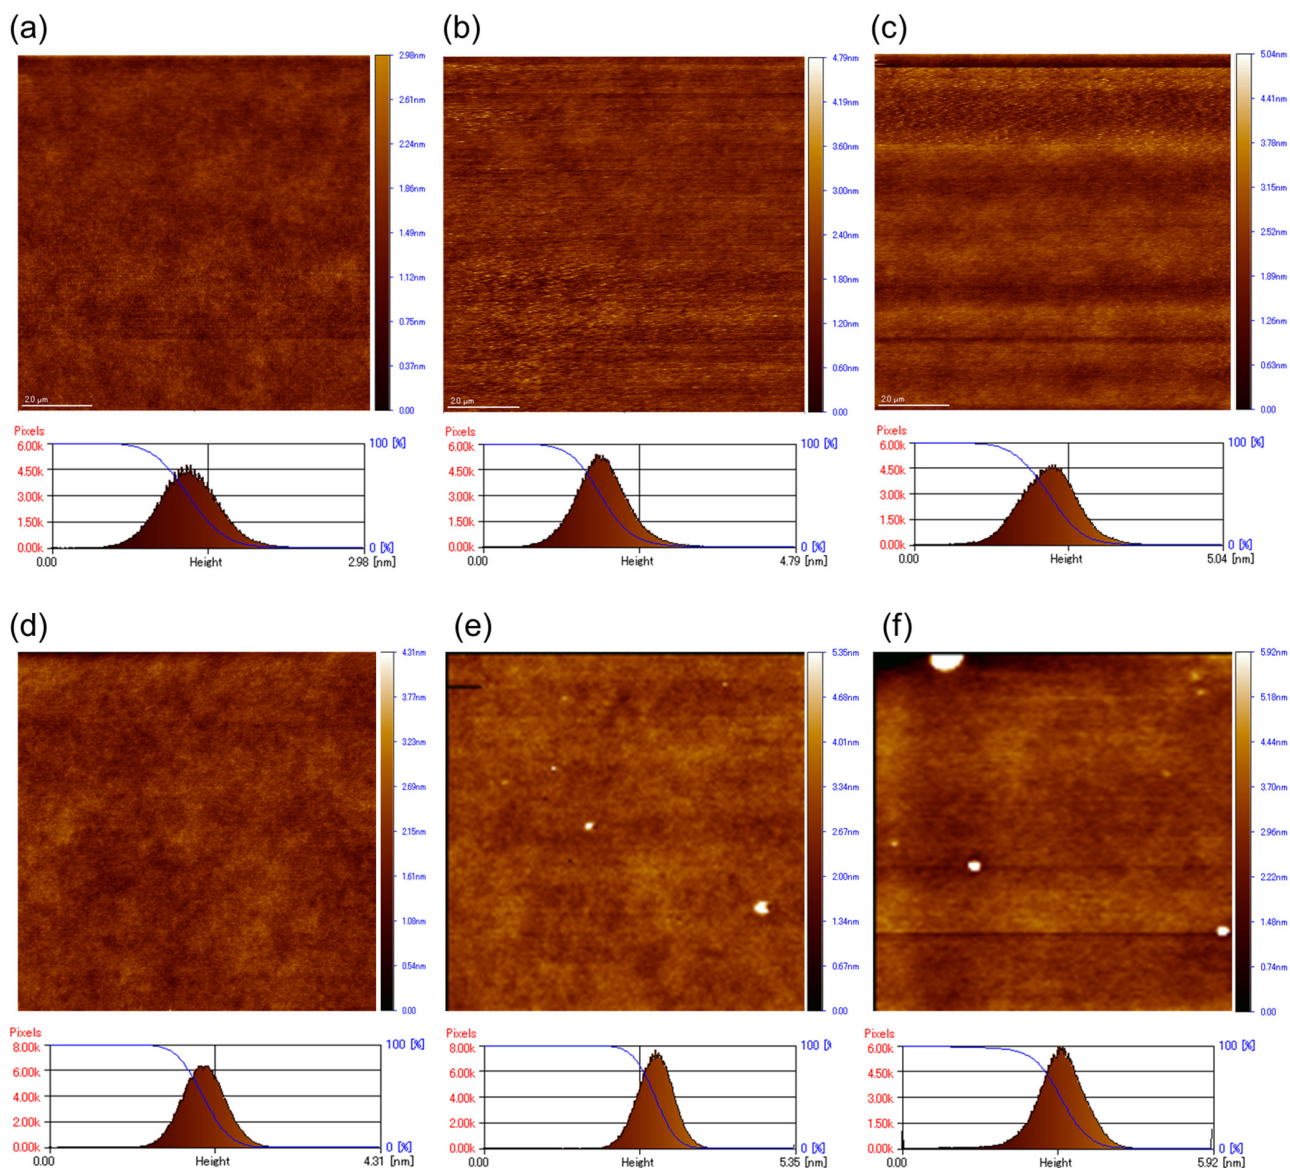

**Fig. S7.** AFM images for doped and neat films. (a) **1**-doped CBP, (b) **2**-doped CBP, (c) **3**-doped CBP, (d) **1**-neat, (e) **2**-neat and (f) **3**-neat films. The room mean square (RMS) roughness were 0.23, 0.33 and 0.37 for **1**-doped, **2**-doped and **3**-doped films, respectively, and 0.22, 0.25 and 0.46 nm for **1**-neat, **2**-neat and **3**-neat films, respectively. Note that the RMS for **3**-neat film without a granular lump was 0.29 nm.



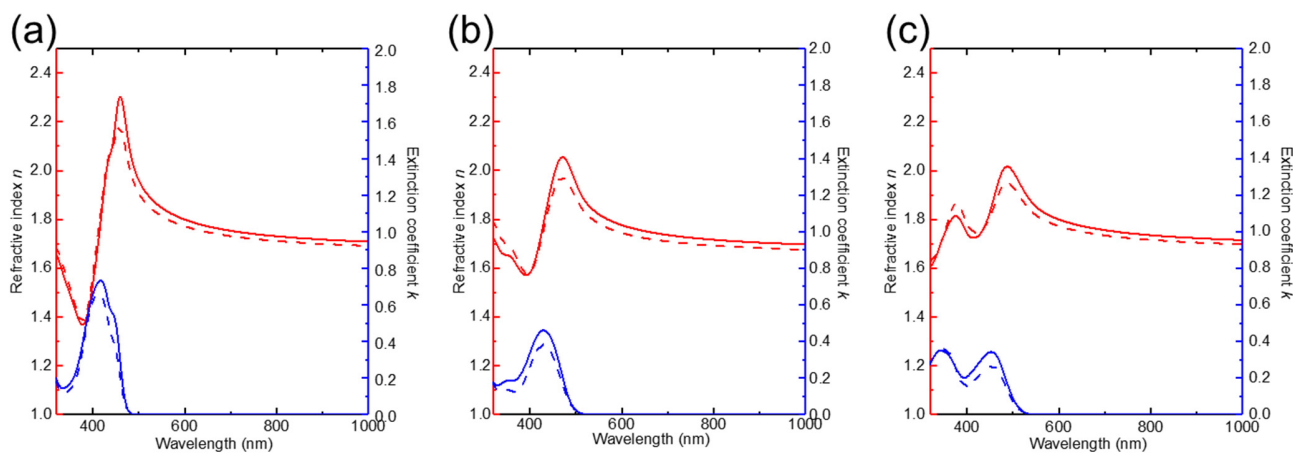

**Fig. S8.** Variable-angle spectroscopic ellipsometry measurements of (a) **1**, (b) **2** and (c) **3** in neat films (solid lines: ordinary, and dashed lines: extraordinary).

**Table S3.** Ordinary and extraordinary refractive indices and horizontally orientation order parameters of **1**, **2** and **3** in neat films.

| Sample   | Ordinary refractive index $n_o^a$ | Extraordinary refractive index $n_e^a$ | Birefringence $\Delta n = n_o - n_e$ | Orientation order parameter $S^b$ | $n_o$ at the ASE wavelength <sup>c)</sup> | $n_e$ at the ASE wavelength <sup>c)</sup> |
|----------|-----------------------------------|----------------------------------------|--------------------------------------|-----------------------------------|-------------------------------------------|-------------------------------------------|
| <b>1</b> | 1.70                              | 1.67                                   | 0.0265                               | -0.039                            | 1.91                                      | 1.86                                      |
| <b>2</b> | 1.82                              | 1.78                                   | 0.0385                               | -0.060                            | 1.84                                      | 1.80                                      |
| <b>3</b> | 1.85                              | 1.82                                   | 0.0358                               | -0.080                            | 1.85                                      | 1.81                                      |

a) At 550 nm. b)  $S = (3\cos^2\theta - 1)/2 = (k_e - k_o)/(k_e + 2k_o)$ , where  $k_o$  and  $k_e$  are the ordinary and extraordinary extinction coefficients at the peak wavelength. c) At 518, 548 and 567 nm for **1**, **2** and **3**, respectively.

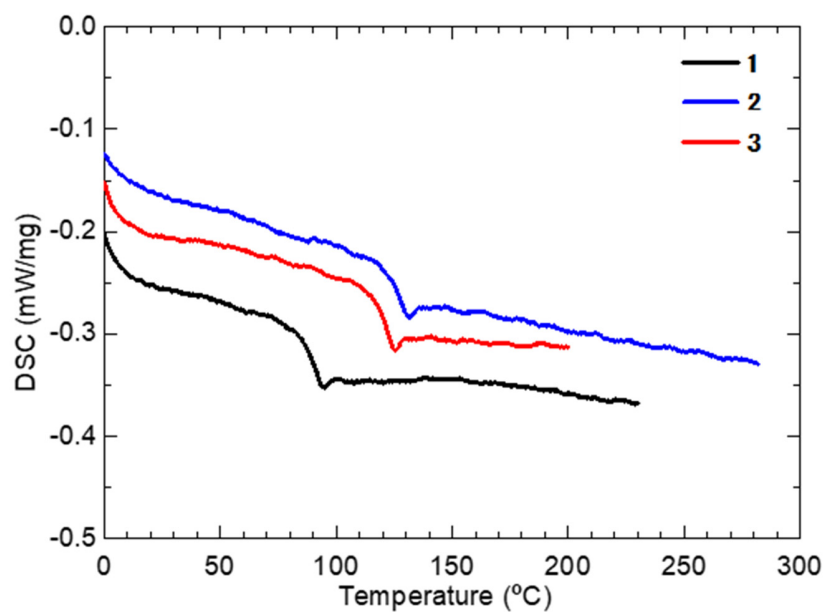

**Fig. S9.** DSC curves of 1, 2 and 3. The glass transition temperatures ( $T_g$ ) were 90.7, 127.8 and 122.0 °C for 1, 2 and 3, respectively.

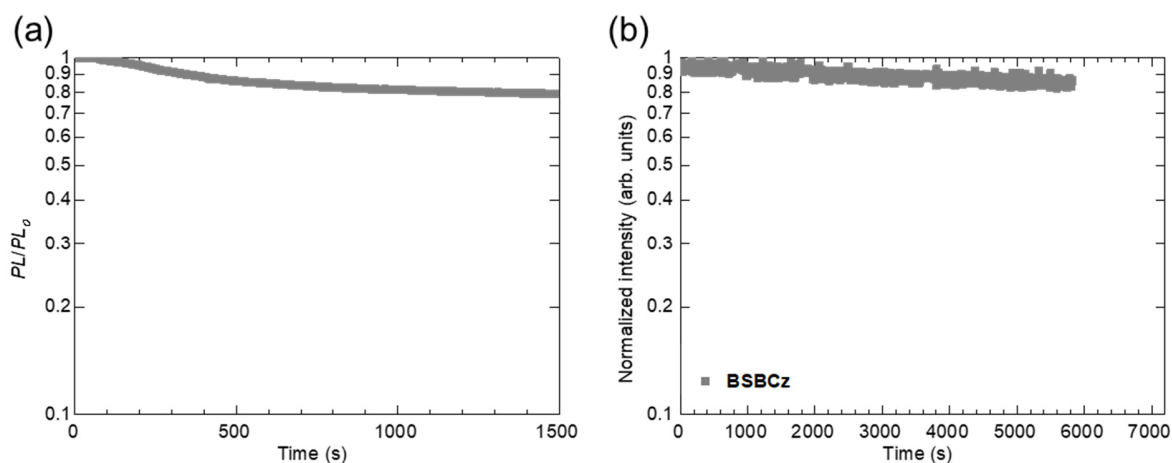

**Fig. S10.** Photo-stability for BSBCz. (a) PL and (b) ASE intensities normalized to the initial as a function of time for BSBCz irradiated by continuous-wave laser light at 355 nm and a nitrogen gas laser at 337 nm, respectively. Excitation intensity: (a)  $120 \text{ mW cm}^{-2}$  and (b)  $280 \mu\text{J cm}^{-2}$ .

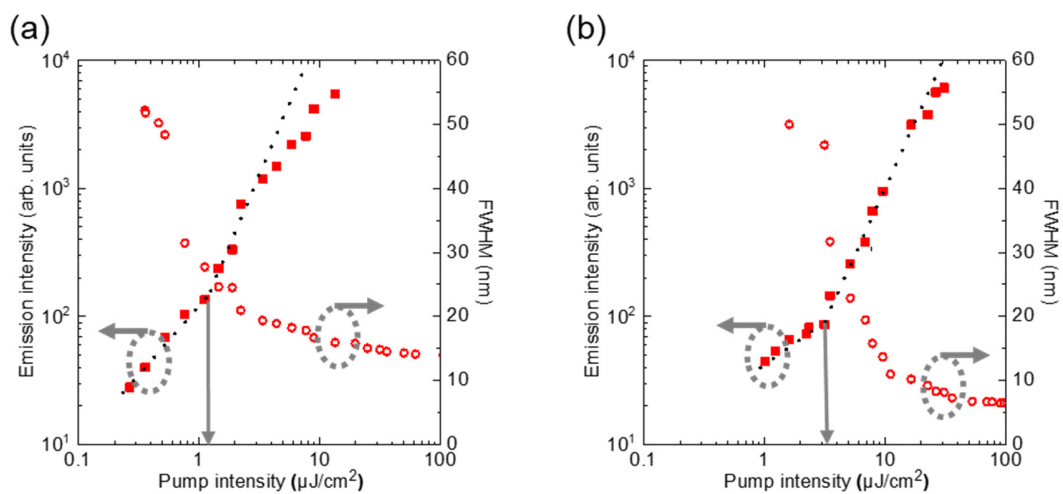

**Fig. S11.** ASE properties of **3** in (a) doped CBP film and (b) neat film.

**Methods. S1.** Calculation of the absorption and stimulated emission cross sections ( $\sigma_{abs}$  and  $\sigma_{em}$ )<sup>S1</sup>

The absorption cross section  $\sigma_{abs}(\lambda)$  was estimated by the following formula.

$$\sigma_{abs}(\lambda) = \frac{1000\varepsilon(\lambda)\ln 10}{N_A}$$

Here,  $\varepsilon(\lambda)$  is the molar absorption coefficient and  $N_A$  is the Avogadro number.

Next, the stimulated emission cross section  $\sigma_{em}(\lambda)$  was evaluated by the following formula.

$$\sigma_{em}(\lambda) = \frac{\lambda^4 E_f(\lambda)}{8\pi n^2(\lambda) c \tau_f}$$

$E_f(\lambda)$  corresponds to the distribution of PL efficiency and  $n$  is the dispersion of the refractive index.  $\tau_f$  corresponds to the fluorescence lifetime.

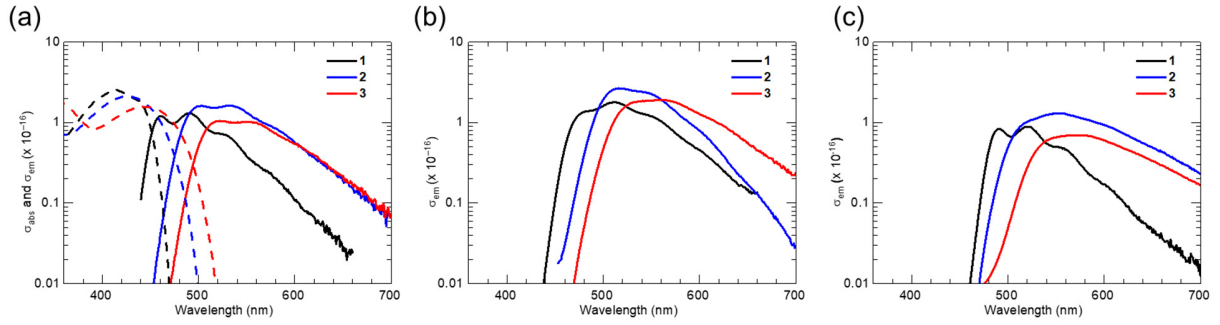

**Fig. S12.** Absorption and stimulated emission cross sections ( $\sigma_{abs}$  and  $\sigma_{em}$ ) spectra (a) in solution, and  $\sigma_{em}$  (b) in doped films and (c) in neat films for **1**, **2** and **3**.

**Data S1. NMR spectra of 1–3**

<sup>1</sup>H NMR spectrum of **1** (500 MHz, CDCl<sub>3</sub>, 300K)

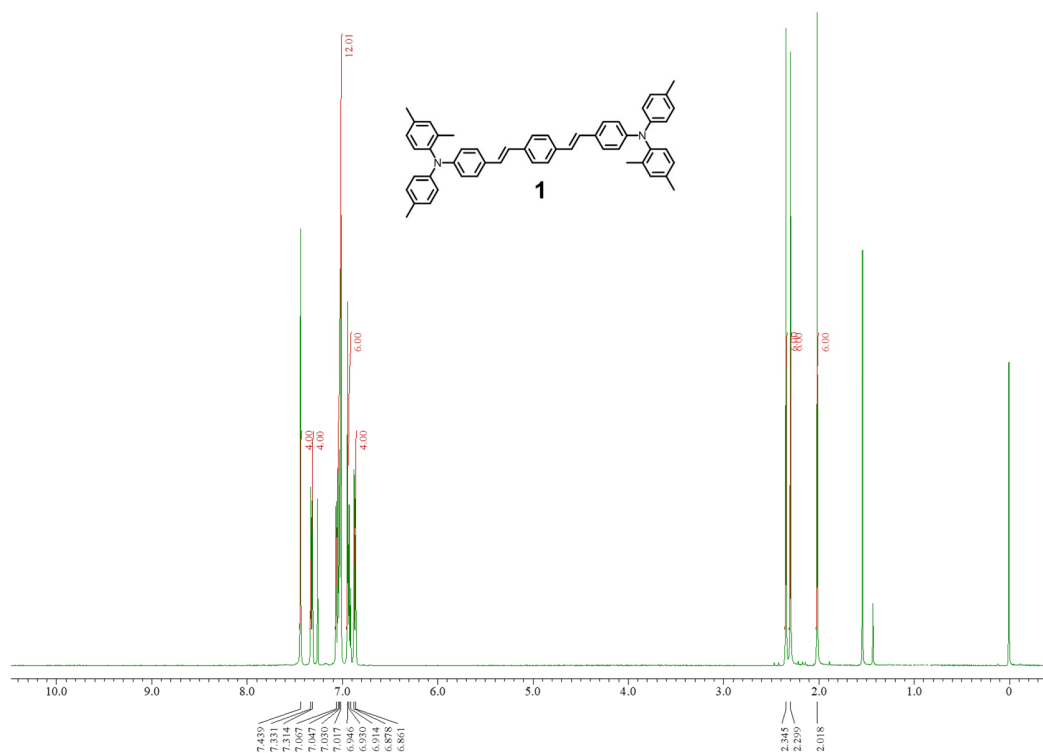

<sup>13</sup>C NMR spectrum of **1** (125 MHz, CDCl<sub>3</sub>, 300K)

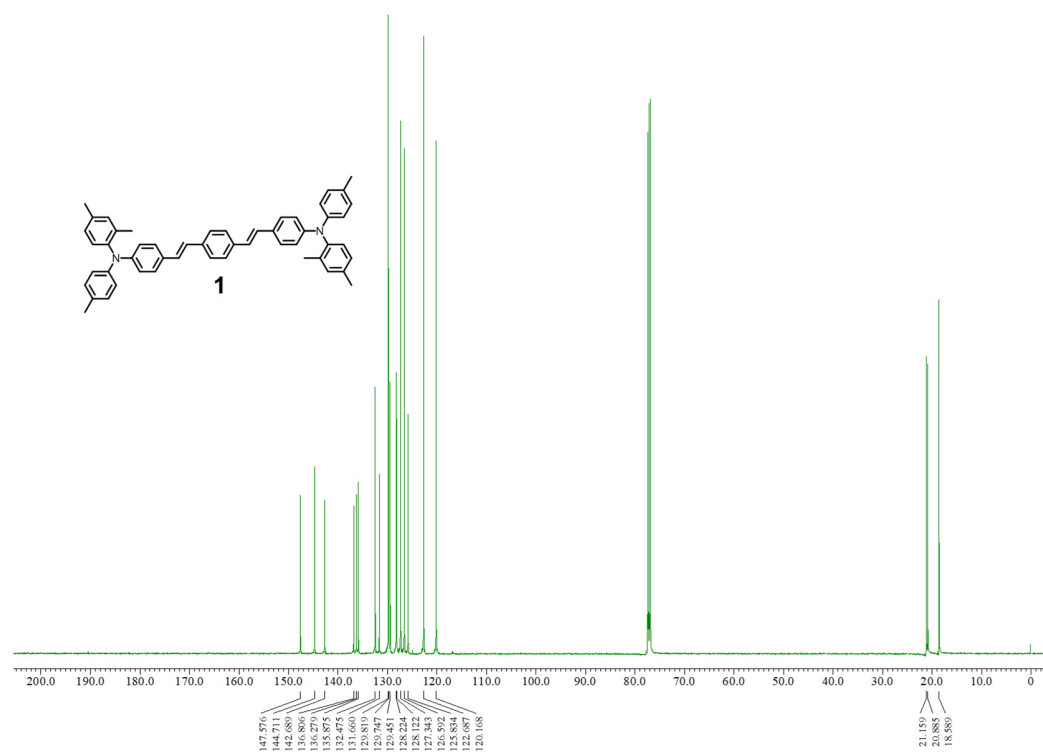

$^1\text{H}$  NMR spectrum of **2** (500 MHz,  $\text{CDCl}_3$ , 300K)

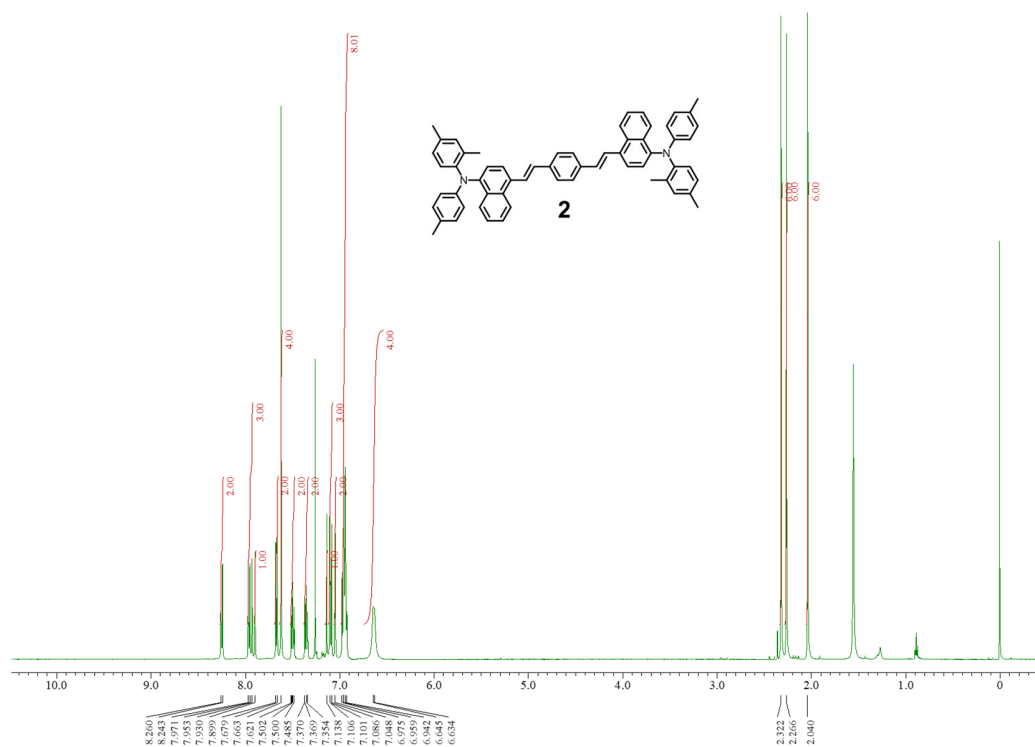

$^{13}\text{C}$  NMR spectrum of **2** (125 MHz,  $\text{CDCl}_3$ , 300K)

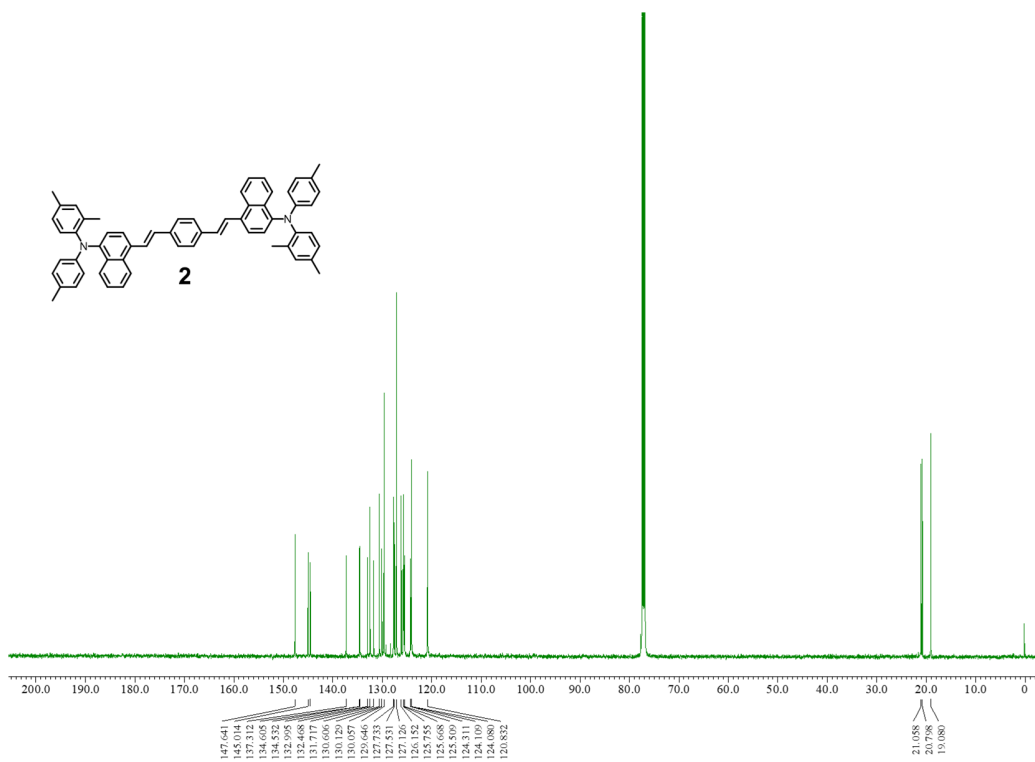

$^1\text{H}$  NMR spectrum of **3** (500 MHz,  $\text{CDCl}_3$ , 300K)

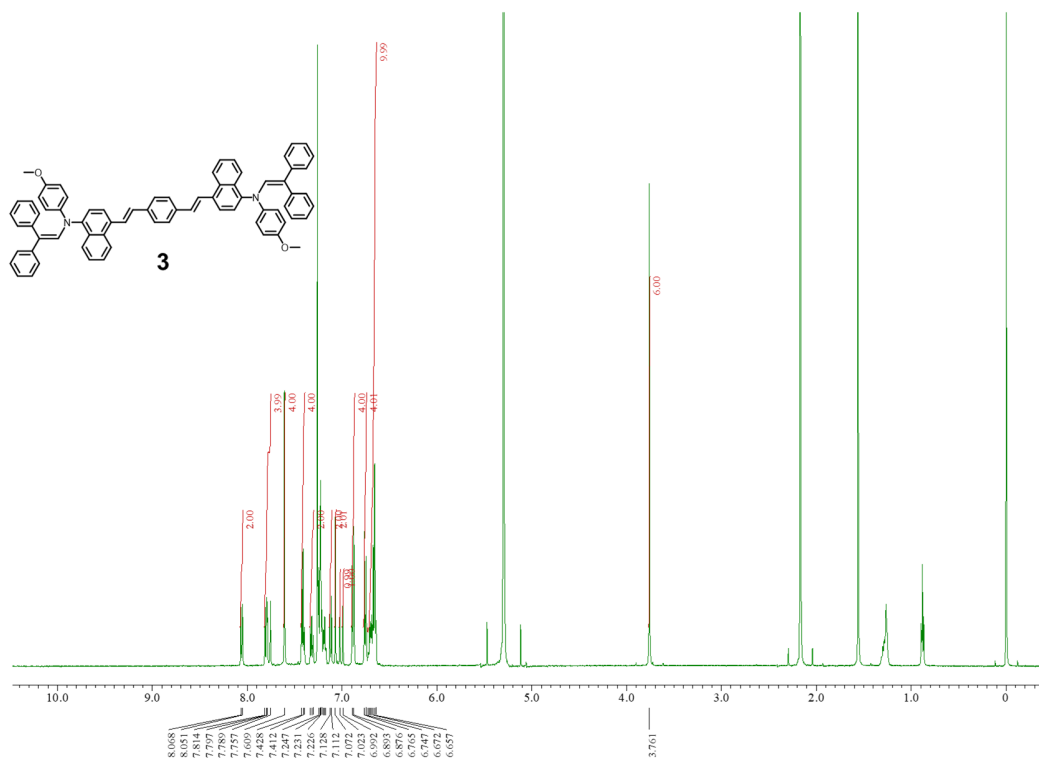

$^{13}\text{C}$  NMR spectrum of **3** (125 MHz,  $\text{CDCl}_3$ , 300K)

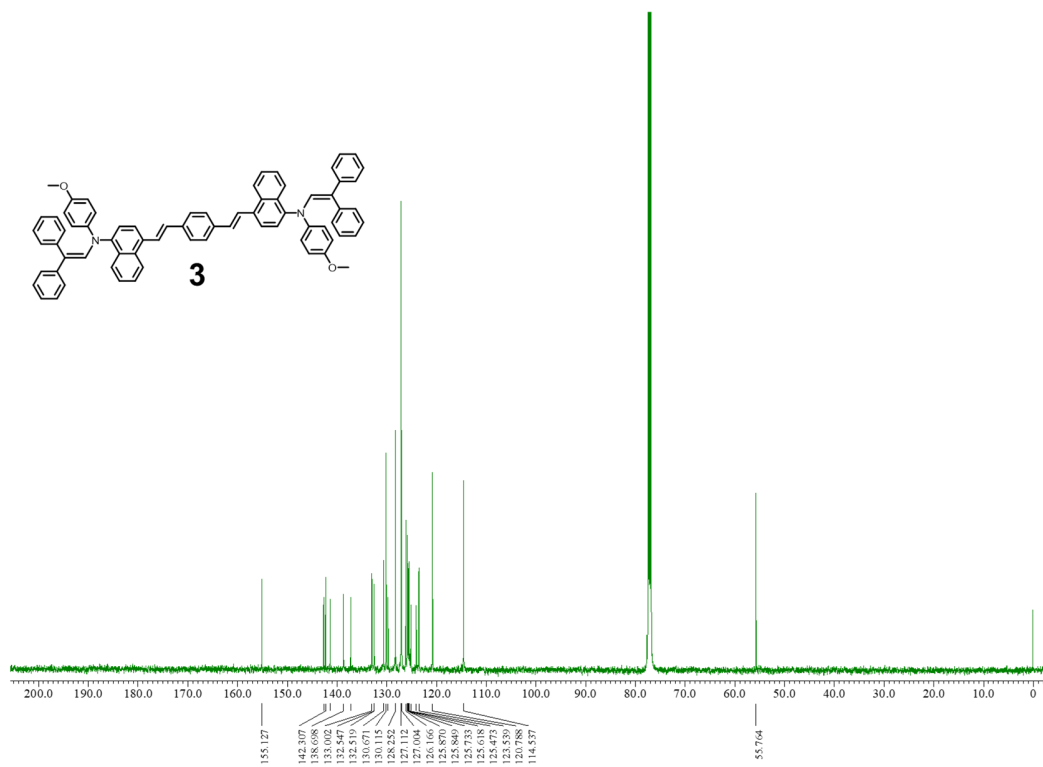





H-H COSY NMR spectrum of **3** (500 MHz, CDCl<sub>3</sub>, 300K)

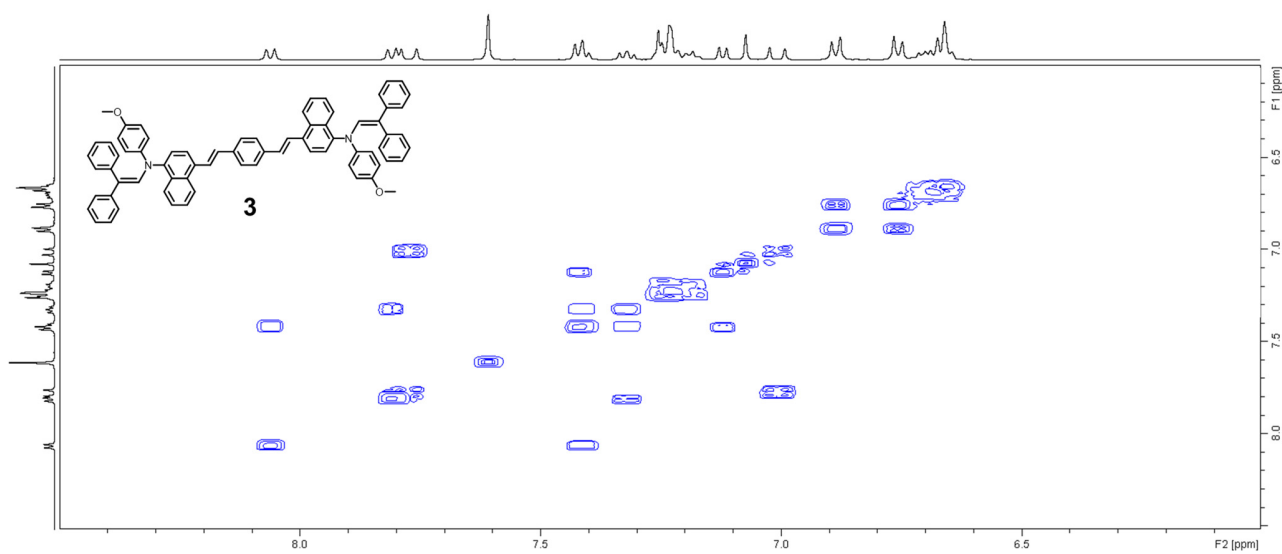

### Supplementary Reference

(S1) H. Nakanotani, C. Adachi, S. Watanabe and R. Katoh, *Appl. Phys. Lett.* 2007, **90**, 231109.
